# Supplementary material
Source: Springer Nature journal article supplement (https://www.springermedizin.de/resource/supplementary/12882_2012_347_MOESM1_ESM.pdf/9453468)

60-69 years

70-79 years

&gt;80

years

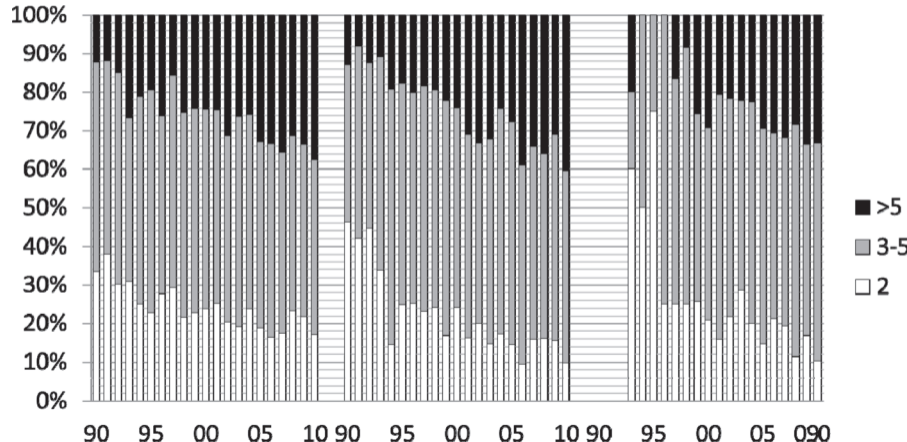

Supplement: MOESM1 [file 9453468]
